# Supplementary material
Source: HighWire-hosted journal article supplement (http://ajnr-stage2.highwire.org/highwire/filestream/106277/field_highwire_adjunct_files/0/0453.pdf)

**Supplemental Table 1. The detail MR features of category B culprit plaques**

| Number | Location     | Enhancement grade <sup>&amp;</sup> | Stenosis grade <sup>#</sup> |
|--------|--------------|------------------------------------|-----------------------------|
| 1      | LM1/LM1      | 2/1                                | 3/2                         |
| 2      | RM1/RC7      | 2/1                                | 3/1                         |
| 3      | RM1/RM1/RC7  | 1/0/0                              | 2/1/1                       |
| 4      | LVA/BA       | 2/1                                | 3/1                         |
| 5      | LV4/LV4/LPCA | 2/1/1                              | 3/1/2                       |
| 6      | RM1/RM1      | 2/1                                | 3/1                         |

&: grade 0, no enhancement; grade 1, mild enhancement; grade 2, significant enhancement.

#: grade1, 30%≤Stenosis<50%; grade2, 50%≤Stenosis<70%; grade3, Stenosis≥70%.

LM, left middle cerebral artery; RM, right middle cerebral artery; C7: internal carotid artery C7; VA: vertebral artery; BA, basilar artery; PCA, posterior cerebral artery.

**Supplemental Table 2. The differences in the enhancement grades between culprit and non-culprit plaques.**

| Phase                 | All plaque | Culprit plaque | Non-culprit plaque | P*     |
|-----------------------|------------|----------------|--------------------|--------|
| Phase 1 <sup>st</sup> |            |                |                    |        |
| Grade 0               | 16(14.2%)  | 0 (0%)         | 16(19.3%)          | <0.001 |
| Grade 1               | 69(61.1%)  | 11 (36.7%)     | 58(69.9%)          |        |
| Grade 2               | 28(24.7)   | 19 (63.3%)     | 9(10.8%)           |        |
| Phase 2 <sup>nd</sup> |            |                |                    |        |
| Grade 0               | 6(5.3%)    | 0(0%)          | 6(7.2%)            | <0.001 |
| Grade 1               | 65(57.5%)  | 7(23.3%)       | 58(69.9%)          |        |
| Grade 2               | 42(37.2%)  | 23(76.7%)      | 19(22.9%)          |        |
| Phase 3 <sup>rd</sup> |            |                |                    |        |
| Grade 0               | 8(7.1%)    | 0(0%)          | 8(9.6%)            | <0.001 |
| Grade 1               | 57(50.4%)  | 3(10.0%)       | 54(65.1%)          |        |
| Grade 2               | 48(42.5%)  | 27(90.0%)      | 21(25.3%)          |        |
| Phase 4 <sup>th</sup> |            |                |                    |        |
| Grade 0               | 7(6.2%)    | 0              | 7(8.4%)            | <0.001 |

|         |           |           |           |
|---------|-----------|-----------|-----------|
| Grade 1 | 52(46.0)  | 2(6.7%)   | 50(60.2%) |
| Grade 2 | 54(47.8%) | 28(93.3%) | 26(31.3%) |

\*. The differences in the enhancement grades between culprit and non-culprit plaques in different post-contrast phases.

**Supplemental Table 3. The enhancement grade change of plaque during 4 post-contrast phases in culprit plaque and non-culprit plaque group.**

| Components                                  | All plaque | Culprit plaque<br>n (%) | Non-culprit plaque<br>n (%) |
|---------------------------------------------|------------|-------------------------|-----------------------------|
| From grade 0 to grade 1                     | 12(10.6%)  | 0(0%)                   | 12(14.5%)                   |
| From grade 0 to grade 2                     | 3(2.7%)    | 0(0%)                   | 3(3.6%)                     |
| From grade 1 to grade 2                     | 25(22.1%)  | 9(30.0%)                | 16(19.3%)                   |
| From grade 1 to grade 0                     | 6(5.3%)    | 0(0%)                   | 6(7.2%)                     |
| From grade 2 to grade 1                     | 2(1.8%)    | 0(0%)                   | 2(2.4%)                     |
| Change from grade 0 to 1<br>then to grade 0 | 3(2.7%)    | 0(0%)                   | 3(3.6%)                     |
| Change from grade 1 to 2<br>then to grade 1 | 1(0.9%)    | 0(0%)                   | 1(1.2%)                     |
| Change from grade 0 to 1<br>then to grade 2 | 1(0.9%)    | 0(0%)                   | 1(1.2%)                     |
| All plaques with changes in<br>Grade        | 42(37.2%)  | 9(30.0%)                | 33(39.8%)                   |

**Supplemental Table 4. Plaque enhancement grade in different contrast-enhanced phases to differentiate culprit and non-culprit plaque.**

| Variables             | AUC (95%CI)        | Sensitivity/Specificity | P<br>value |
|-----------------------|--------------------|-------------------------|------------|
| Grade 1 <sup>st</sup> | 0.798(0.712-0.867) | 89.2%/63.33%            | <0.001     |

| Grade 2 <sup>nd</sup>                            | 0.777(0.689-0.850)                     | 77.11%/76.67% | <b>&lt;0.001</b>   |
|--------------------------------------------------|----------------------------------------|---------------|--------------------|
| Grade 3 <sup>rd</sup>                            | 0.828(0.746-0.893)                     | 74.70%/90.00% | <b>&lt;0.001</b>   |
| Grade 4 <sup>th</sup>                            | 0.813(0.729-0.880)                     | 68.67%/93.33% | <b>&lt;0.001</b>   |
| <b>Variables</b>                                 | <b>Difference between AUC<br/>area</b> | <b>95%CI</b>  | <b>P<br/>value</b> |
| Grade 1 <sup>st</sup> vs Grade 2 <sup>nd</sup> & | 0.021±0.034                            | -0.047-0.088  | 0.551              |
| Grade 1 <sup>st</sup> vs Grade 3 <sup>rd</sup> & | 0.031±0.041                            | -0.049-0.110  | 0.452              |
| Grade 1 <sup>st</sup> vs Grade 4 <sup>th</sup> & | 0.015±0.043                            | -0.069-0.099  | 0.726              |
| Grade 2 <sup>nd</sup> vs Grade 3 <sup>rd</sup> & | 0.051±0.032                            | -0.011-0.113  | 0.107              |
| Grade 2 <sup>nd</sup> vs Grade 4 <sup>th</sup> & | 0.036±0.035                            | -0.034-0.105  | 0.318              |
| Grade 3 <sup>rd</sup> vs Grade 4 <sup>th</sup> & | 0.016±0.020                            | -0.024-0.055  | 0.440              |

&: Refer to comparing the ROC curves (the AUCs) between two postcontrast phases.

CI: Confidence Interval.

**Supplemental Table 5. Inter-reader and intra-reader agreement for evaluation of**

|                                |                       | Inter-observer          | Intra-observer     |
|--------------------------------|-----------------------|-------------------------|--------------------|
| Parameter                      |                       | Kendall's W/ICC (95%CI) | Kappa/ICC (95%CI)  |
| <b>Plaque</b>                  | Pre-contrast          | 0.983 (0.959-0.993)     | 0.980(0.949-0.992) |
|                                | 1 <sup>st</sup> phase | 0.981 (0.953-0.992)     | 0.976(0.942-0.990) |
|                                | 2 <sup>nd</sup> phase | 0.983 (0.958-0.993)     | 0.947(0.874-0.979) |
|                                | 3 <sup>rd</sup> phase | 0.980 (0.952-0.992)     | 0.974(0.937-0.990) |
|                                | 4 <sup>th</sup> phase | 0.981 (0.952-0.992)     | 0.978(0.938-0.991) |
| <b>Cerebrospinal fluid</b>     | Pre-contrast          | 0.988 (0.969-0.995)     | 0.988(0.970-0.995) |
|                                | 1 <sup>st</sup> phase | 0.964 (0.912-0.986)     | 0.973(0.934-0.989) |
|                                | 2 <sup>nd</sup> phase | 0.977 (0.944-0.991)     | 0.921(0.812-0.968) |
|                                | 3 <sup>rd</sup> phase | 0.978 (0.946-0.991)     | 0.951(0.881-0.980) |
|                                | 4 <sup>th</sup> phase | 0.976 (0.940-0.990)     | 0.961(0.904-0.984) |
| <b>Enhancement grade(1vs2)</b> |                       | 0.824(0.645-1.000)      | 0.883(0.722-1.000) |
| <b>Enhancement grade(0vs1)</b> |                       | 0.902(0.673-1.000)      | 0.891(0.649-1.000) |

**plaque and reference structure signal intensity (n=20)**  
ICC, intra-class correlation coefficient

**Supplemental Figure 1. Dynamic changes of qualitative enhancement of culprit and non-culprit plaques.**

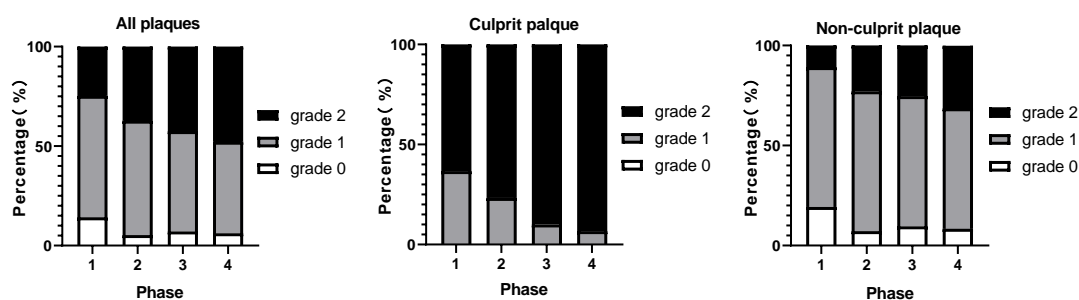

**Supplemental Figure 2. The ROC of plaque enhancement grade in 4 contrast-enhanced phases for differentiating culprit and non-culprit plaques**

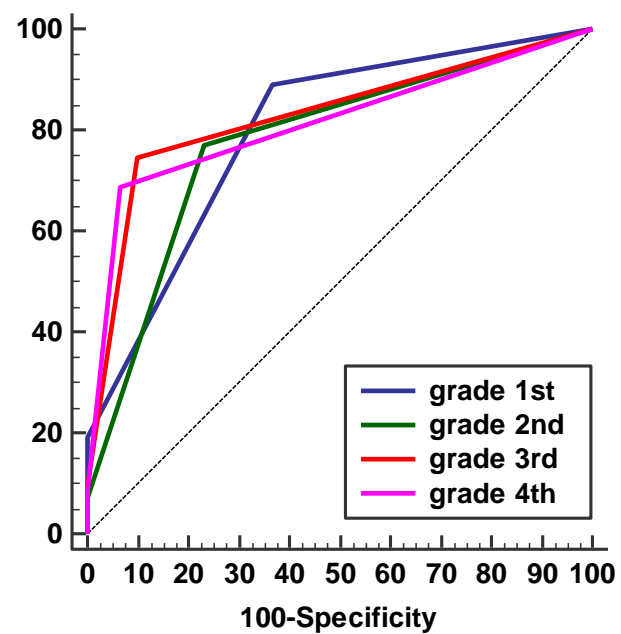

Supplement: 0453.pdf [file 0453.pdf]
